# Supplementary material
Source: PubMed Central journal article supplement (PMC9996212)
Supplement: djac203_supplementary_data.pdf [file djac203_supplementary_data.pdf]

**Supplementary Material**

**Supplementary Table 1.** ICD-9 and ICD-10 codes

|                               | ICD-9 (Before Sep 30, 2015)                                                               | ICD-10 (After Sep 30, 2015)                                                                                                                                                |
|-------------------------------|-------------------------------------------------------------------------------------------|----------------------------------------------------------------------------------------------------------------------------------------------------------------------------|
| Primary tumor for lung cancer | 162                                                                                       | C33-C34                                                                                                                                                                    |
| Other cancers for exclusion   | 140-149<br>150-159<br>160-161<br>163-165<br>170-176<br>179-189<br>190-195, 199<br>200-209 | C00-C14<br>C15-C26<br>C30-C32, C37-C39<br>C40-C41<br>C43-C44<br>C45-C49<br>C50<br>C51-C58<br>C60-C63<br>C64-C68<br>C69-C72<br>C73-C75<br>C76, C80<br>C7A<br>C7B<br>C81-C96 |
| Secondary neoplasm            | 196-198                                                                                   | C77-C79                                                                                                                                                                    |

**Supplementary Table 2.** J codes for immune checkpoint inhibitors

| Generic name  | J code              |
|---------------|---------------------|
| ipilimumab    | J9228               |
| pembrolizumab | J9271, C9027        |
| nivolumab     | C9453, J9299        |
| cemiplimab    | J9119, C9044, J9119 |
| atezolizumab  | C9483, J9022        |
| durvalumab    | J9173, C9492        |

**Supplementary Table 3.** Characteristics of study population by quintiles of Black population in a county

|                                                                    | All N=17,022  | By Black population quintiles |              |              |              |                        |
|--------------------------------------------------------------------|---------------|-------------------------------|--------------|--------------|--------------|------------------------|
|                                                                    |               | 1 (Lowest percentage)         | 2            | 3            | 4            | 5 (Highest percentage) |
| Age, mean (SD)                                                     | 71.5 (9.3)    | 71.5 (9.2)                    | 72.1 (9.0)   | 71.7 (9.2)   | 71.5 (9.7)   | 70.6 (9.2)             |
| Female, n (%)                                                      | 8,967 (52.7)  | 1,791 (52.3)                  | 1,794 (52.8) | 1,842 (54.0) | 1,801 (52.4) | 1,739 (52.0)           |
| Percentage of population living below poverty line, mean (SD)      | 13.1 (4.6)    | 11.6 (4.8)                    | 11.7 (4.2)   | 12.2 (3.5)   | 13.2 (3.3)   | 16.9 (4.8)             |
| Urbanity of county, n (%)                                          |               |                               |              |              |              |                        |
| Metro                                                              | 14,632 (85.9) | 2,225 (64.9)                  | 2,951 (86.9) | 3,268 (95.7) | 3,286 (95.4) | 2,905 (86.7)           |
| Urban                                                              | 2,049 (12.0)  | 992 (29.0)                    | 399 (11.7)   | 136 (4.0)    | 145 (4.2)    | 377 (11.3)             |
| Rural                                                              | 351 (2.1)     | 212 (6.2)                     | 48 (1.4)     | 11 (0.3)     | 12 (0.4)     | 68 (2.0)               |
| Number of medical oncologists per 100,000 in the county, mean (SD) | 4.5 (4.5)     | 2.4 (3.1)                     | 3.8 (3.4)    | 4.5 (3.2)    | 5.8 (5.4)    | 6.5 (5.6)              |
| Charlson comorbidity index, n (%)                                  |               |                               |              |              |              |                        |
| 0                                                                  | 3,333 (19.6)  | 707 (20.6)                    | 642 (18.9)   | 635 (18.6)   | 693 (20.1)   | 656 (19.6)             |
| 1-2                                                                | 4,046 (23.8)  | 886 (25.9)                    | 816 (24.1)   | 819 (24.0)   | 754 (21.9)   | 771 (23.0)             |
| >=3                                                                | 9,124 (53.6)  | 1,742 (50.9)                  | 1,834 (54.0) | 1,851 (54.2) | 1,875 (54.5) | 1,822 (54.4)           |
| Medicare Advantage, n (%)                                          | 13,861 (81.4) | 2,799 (81.7)                  | 2,806 (82.6) | 2,774 (81.2) | 2,788 (81.0) | 2,694 (80.4)           |
| Checkpoint inhibitor initiation, n (%)                             |               |                               |              |              |              |                        |
| Yes                                                                | 6,988 (41.0)  | 1,479 (43.2)                  | 1,330 (39.1) | 1,265 (37.0) | 1,432 (41.6) | 1,482 (44.2)           |
| Censored                                                           | 10,044 (59.0) | 1,947 (56.8)                  | 2,068 (60.9) | 2,150 (63.0) | 2,011 (58.4) | 1,868 (55.8)           |

|                                                            |             |             |             |             |             |             |
|------------------------------------------------------------|-------------|-------------|-------------|-------------|-------------|-------------|
| Length of continuous enrollment<br>after diagnosis, months | 15.6 (14.2) | 15.5 (13.8) | 16.6 (15.1) | 16.9 (15.5) | 14.9 (13.5) | 14.4 (12.8) |
|------------------------------------------------------------|-------------|-------------|-------------|-------------|-------------|-------------|

HR: Hazard ratio. CI: Confidence interval.

**Supplementary Table 4.** Characteristics of study population by quintiles of Hispanic population in a county

|                                                                    | All N=17,022  | By Hispanic population quintiles |              |                |              |                        |
|--------------------------------------------------------------------|---------------|----------------------------------|--------------|----------------|--------------|------------------------|
|                                                                    |               | 1 (Lowest percentage)            | 2            | 3              | 4            | 5 (Highest percentage) |
| Age, mean (SD)                                                     | 71.5 (9.3)    | 70.3 (9.3)                       | 70.6 (9.4)   | 71.8 (9.0)     | 72.0 (9.5)   | 72.8 (9.2)             |
| Female, n (%)                                                      | 8,967 (52.7)  | 1,697 (49.7)                     | 1,815 (53.1) | 1,853 (53.9)   | 1,826 (53.7) | 1,776 (53.1)           |
| Percentage of population living below poverty line, mean (SD)      | 13.1 (4.6)    | 13.8 (5.8)                       | 13.0 (5.0)   | 12.4 (4.1)     | 11.9 (3.8)   | 14.4 (3.5)             |
| Urbanity of county, n (%)                                          |               |                                  |              |                |              |                        |
| Metro                                                              | 14,632 (85.9) | 2,103 (61.6)                     | 2,889 (84.3) | 3,132 (91.0)   | 3,261 (95.9) | 3,247 (97.0)           |
| Urban                                                              | 2,049 (12.0)  | 1,055 (30.9)                     | 475 (13.9)   | 303 (8.8)      | 122 (3.6)    | 94 (2.8)               |
| Rural                                                              | 351 (2.1)     | 255 (7.5)                        | 63 (1.8)     | _ <sup>a</sup> | 19 (0.6)     | _ <sup>a</sup>         |
| Number of medical oncologists per 100,000 in the county, mean (SD) | 4.5 (4.5)     | 2.9 (3.9)                        | 4.6 (4.9)    | 5.4 (4.7)      | 5.6 (5.4)    | 4.5 (2.6)              |
| Charlson comorbidity index, n (%)                                  |               |                                  |              |                |              |                        |
| 0                                                                  | 3,333 (19.6)  | 661 (19.4)                       | 691 (20.2)   | 647 (18.8)     | 705 (20.7)   | 629 (18.8)             |
| 1-2                                                                | 4,046 (23.8)  | 871 (25.5)                       | 819 (23.9)   | 852 (24.8)     | 807 (23.7)   | 697 (20.8)             |
| >=3                                                                | 9,124 (53.6)  | 1,796 (52.6)                     | 1,806 (52.7) | 1,845 (53.6)   | 1,776 (52.2) | 1,901 (56.8)           |
| Medicare Advantage, n (%)                                          | 13,861 (81.4) | 2,679 (78.5)                     | 2,685 (78.4) | 2,926 (85.0)   | 2,746 (80.7) | 2,825 (84.4)           |
| Checkpoint inhibitor initiation, n (%)                             |               |                                  |              |                |              |                        |
| Yes                                                                | 6,988 (41.0)  | 1,565 (45.9)                     | 1,546 (45.1) | 1,405 (40.8)   | 1,396 (41.0) | 1,076 (32.2)           |
| Censored                                                           | 10,044 (59.0) | 1,848 (54.2)                     | 1,881 (54.9) | 2,038 (59.2)   | 2,006 (59.0) | 2,271 (67.9)           |

|                                                            |             |             |             |             |             |             |
|------------------------------------------------------------|-------------|-------------|-------------|-------------|-------------|-------------|
| Length of continuous enrollment<br>after diagnosis, months | 15.6 (14.2) | 13.8 (12.2) | 13.8 (12.1) | 15.6 (14.1) | 15.5 (14.2) | 19.6 (17.0) |
|------------------------------------------------------------|-------------|-------------|-------------|-------------|-------------|-------------|

HR: Hazard ratio. CI: Confidence interval.

<sup>a</sup> n is smaller than 11 therefore not presented.

**Supplementary Table 5.** Characteristics of study population by quintiles of other racialized population in a county

|                                                                    | All N=17,022  | By other racialized population quintiles |              |                |                |                        |
|--------------------------------------------------------------------|---------------|------------------------------------------|--------------|----------------|----------------|------------------------|
|                                                                    |               | 1 (Lowest percentage)                    | 2            | 3              | 4              | 5 (Highest percentage) |
| Age, mean (SD)                                                     | 71.5 (9.3)    | 70.6 (9.0)                               | 70.8 (9.2)   | 71.4 (9.4)     | 71.6 (9.2)     | 73.2 (9.3)             |
| Female, n (%)                                                      | 8,967 (52.7)  | 1,671 (48.7)                             | 1,749 (51.5) | 1,892 (54.7)   | 1,841 (54.3)   | 1,814 (54.4)           |
| Percentage of population living below poverty line, mean (SD)      | 13.1 (4.6)    | 15.2 (5.6)                               | 13.0 (4.2)   | 12.9 (4.4)     | 12.7 (3.6)     | 11.6 (4.1)             |
| Urbanity of county, n (%)                                          |               |                                          |              |                |                |                        |
| Metro                                                              | 14,632 (85.9) | 1,826 (53.2)                             | 2,942 (86.5) | 3,299 (95.2)   | 3,359 (99.0)   | 3,206 (96.1)           |
| Urban                                                              | 2,049 (12.0)  | 1,344 (39.1)                             | 420 (12.4)   | 159 (4.6)      | 29 (0.9)       | 97 (2.9)               |
| Rural                                                              | 351 (2.1)     | 265 (7.7)                                | 28 (1.1)     | — <sup>a</sup> | — <sup>a</sup> | — <sup>a</sup>         |
| Number of medical oncologists per 100,000 in the county, mean (SD) | 4.5 (4.5)     | 1.8 (3.0)                                | 3.7 (3.4)    | 6.1 (4.5)      | 5.8 (4.2)      | 5.5 (5.6)              |
| Charlson comorbidity index, n (%)                                  |               |                                          |              |                |                |                        |
| 0                                                                  | 3,333 (19.6)  | 590 (17.2)                               | 638 (18.8)   | 697 (20.1)     | 691 (20.4)     | 717 (21.5)             |
| 1-2                                                                | 4,046 (23.8)  | 798 (23.2)                               | 849 (25.0)   | 809 (23.3)     | 834 (24.6)     | 756 (22.7)             |
| >=3                                                                | 9,124 (53.6)  | 1,958 (57.0)                             | 1,835 (54.0) | 1,846 (53.2)   | 1,748 (51.5)   | 1,737 (52.1)           |
| Medicare Advantage, n (%)                                          | 13,861 (81.4) | 2,814 (81.9)                             | 2,764 (81.3) | 2,793 (80.6)   | 2,724 (80.3)   | 2,766 (82.9)           |
| Checkpoint inhibitor initiation, n (%)                             |               |                                          |              |                |                |                        |
| Yes                                                                | 6,988 (41.0)  | 1,490 (43.4)                             | 1,526 (44.9) | 1,522 (43.9)   | 1,372 (40.4)   | 1,078 (32.3)           |
| Censored                                                           | 10,044 (59.0) | 1,945 (56.6)                             | 1,874 (55.1) | 1,945 (56.1)   | 2,021 (59.6)   | 2,259 (67.7)           |

|                                                            |             |             |             |             |             |             |
|------------------------------------------------------------|-------------|-------------|-------------|-------------|-------------|-------------|
| Length of continuous enrollment<br>after diagnosis, months | 15.6 (14.2) | 13.9 (12.3) | 14.3 (13.0) | 14.8 (13.4) | 16.9 (15.3) | 18.4 (16.2) |
|------------------------------------------------------------|-------------|-------------|-------------|-------------|-------------|-------------|

HR: Hazard ratio. CI: Confidence interval.

<sup>a</sup> n is smaller than 11 therefore not presented.



**Supplementary Table 6.** Cox proportional hazard regression output with racialized population quintiles, 12 months of continuous enrollment post metastatic cancer diagnosis.

|                                                                                               | HR (95% CI)       | P value |
|-----------------------------------------------------------------------------------------------|-------------------|---------|
| Percentage of racialized population in a county quintile; ref: quintile 1 (lowest percentage) |                   |         |
| 2                                                                                             | 0.89 (0.80, 1.01) | 0.064   |
| 3                                                                                             | 0.86 (0.77, 0.97) | 0.011   |
| 4                                                                                             | 0.80 (0.71, 0.91) | <0.001  |
| 5 (Highest percentage)                                                                        | 0.69 (0.59, 0.80) | <0.001  |
| Age group (ref: <55)                                                                          |                   |         |
| [55, 65)                                                                                      | 1.18 (0.92, 1.51) | 0.189   |
| [65, 75)                                                                                      | 1.08 (0.84, 1.38) | 0.541   |
| >=75                                                                                          | 0.84 (0.65, 1.09) | 0.195   |
| Female (ref: Male)                                                                            | 0.81 (0.75, 0.86) | <0.001  |
| Charlson comorbidities (ref: 0)                                                               |                   |         |
| 1-2                                                                                           | 0.97 (0.95, 1.10) | 0.666   |
| >=3                                                                                           | 0.87 (0.87, 0.99) | 0.002   |
| Medicare Advantage                                                                            | 0.92 (0.81, 1.04) | 0.190   |
| Urbanity (ref: metro)                                                                         |                   |         |
| Urban                                                                                         | 1.09 (0.97, 1.22) | 0.150   |
| Rural                                                                                         | 1.37 (1.11, 1.69) | 0.003   |
| Number of medical oncologists per 100,000                                                     | 1.01 (1.00, 1.02) | 0.130   |
| Diagnosis year (ref: 2015)                                                                    |                   |         |
| 2016                                                                                          | 1.19 (1.04, 1.36) | 0.012   |

|      |                   |        |
|------|-------------------|--------|
| 2017 | 1.68 (1.49, 1.89) | <0.001 |
| 2018 | 2.29 (2.05, 2.56) | <0.001 |
| 2019 | 2.97 (2.65, 3.34) | <0.001 |

HR: hazard ratio; CI: confidence interval.

**Supplementary Table 7.** Cox proportional hazard regression output with Black, Hispanic, and other racialized population quintiles, 12 months of continuous enrollment post metastatic cancer diagnosis.

|                                                                                                     | HR (95% CI)       | P value |
|-----------------------------------------------------------------------------------------------------|-------------------|---------|
| Percentage of black in a county quintile; ref: quintile 1 (lowest percentage)                       |                   |         |
| 2                                                                                                   | 0.95 (0.85, 1.07) | 0.417   |
| 3                                                                                                   | 0.92 (0.81, 1.05) | 0.211   |
| 4                                                                                                   | 0.93 (0.83, 1.05) | 0.233   |
| 5 (Highest percentage)                                                                              | 0.98 (0.87, 1.10) | 0.703   |
| Percentage of Hispanic in a county quintile; ref: quintile 1 (lowest percentage)                    |                   |         |
| 2                                                                                                   | 1.04 (0.93, 1.17) | 0.473   |
| 3                                                                                                   | 0.94 (0.84, 1.06) | 0.330   |
| 4                                                                                                   | 0.99 (0.87, 1.12) | 0.880   |
| 5 (Highest percentage)                                                                              | 0.80 (0.70, 0.91) | 0.001   |
| Percentage of other racialized population in a county quintile; ref: quintile 1 (lowest percentage) |                   |         |
| 2                                                                                                   | 1.06 (0.94, 1.19) | 0.369   |
| 3                                                                                                   | 1.06 (0.93, 1.20) | 0.366   |
| 4                                                                                                   | 1.00 (0.88, 1.15) | 0.957   |
| 5 (Highest percentage)                                                                              | 0.74 (0.64, 0.86) | <0.001  |
| Age group (ref: <55)                                                                                |                   |         |
| [55, 65)                                                                                            | 1.16 (0.91, 1.49) | 0.236   |
| [65, 75)                                                                                            | 1.09 (0.85, 1.40) | 0.487   |
| >=75                                                                                                | 0.87 (0.67, 1.13) | 0.290   |

|                                           |                   |        |
|-------------------------------------------|-------------------|--------|
| Female (ref: male)                        | 0.81 (0.75, 0.86) | <0.001 |
| Charlson comorbidities (ref: 0)           |                   |        |
| 1-2                                       | 0.98 (0.90, 1.09) | 0.782  |
| >=3                                       | 0.86 (0.79, 0.94) | 0.001  |
| Medicare Advantage                        | 0.91 (0.81, 1.03) | 0.157  |
| Urbanity (ref: metro)                     |                   |        |
| Urban                                     | 1.07 (0.94, 1.22) | 0.284  |
| Rural                                     | 1.35 (1.08, 1.69) | 0.009  |
| Number of medical oncologists per 100,000 | 1.01 (1.00, 1.02) | 0.144  |
| Diagnosis year (ref: 2015)                |                   |        |
| 2016                                      | 1.19 (1.04, 1.37) | 0.010  |
| 2017                                      | 1.68 (1.49, 1.89) | <0.001 |
| 2018                                      | 2.31 (2.06, 2.59) | <0.001 |
| 2019                                      | 3.01 (2.67, 3.39) | <0.001 |

HR: hazard ratio; CI: confidence interval.

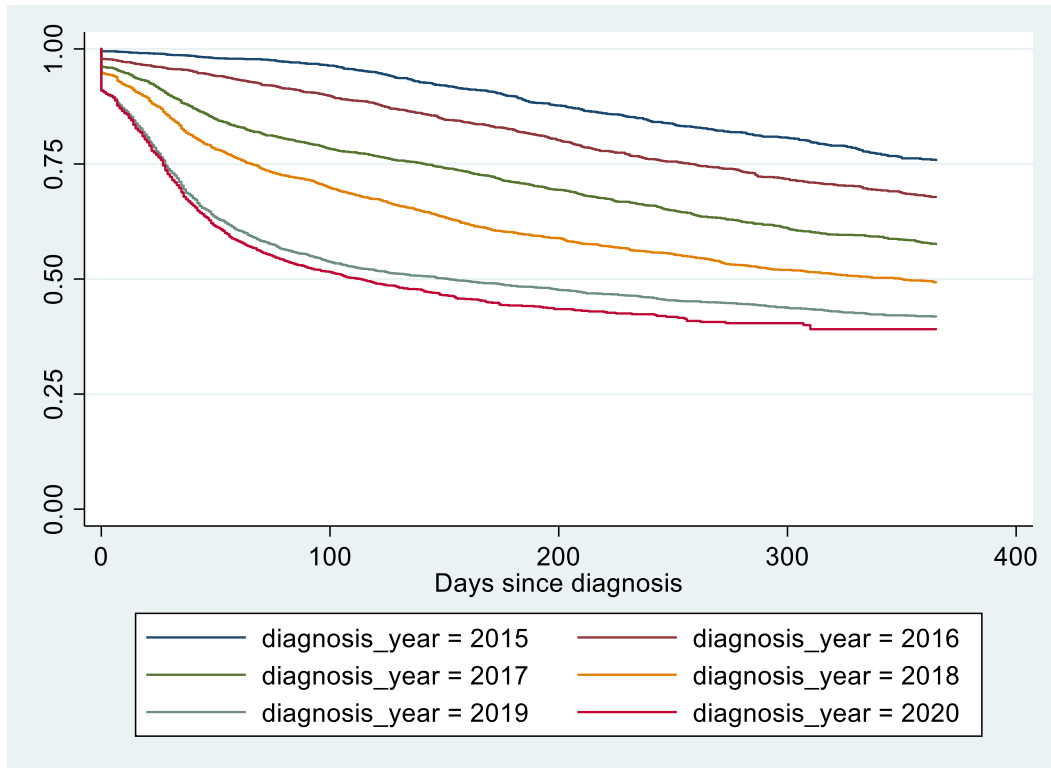

**Supplementary Figure 1.** Kaplan-Meier curves of checkpoint inhibitor initiation following metastatic lung cancer diagnosis by diagnosis year, with follow-up truncated at 1 year. The restricted mean time (truncated at 1 year) for cohorts 2015-2020 were 325, 300, 264, 232, 191, and 180 days, respectively. P-value from log-rank test <0.05.

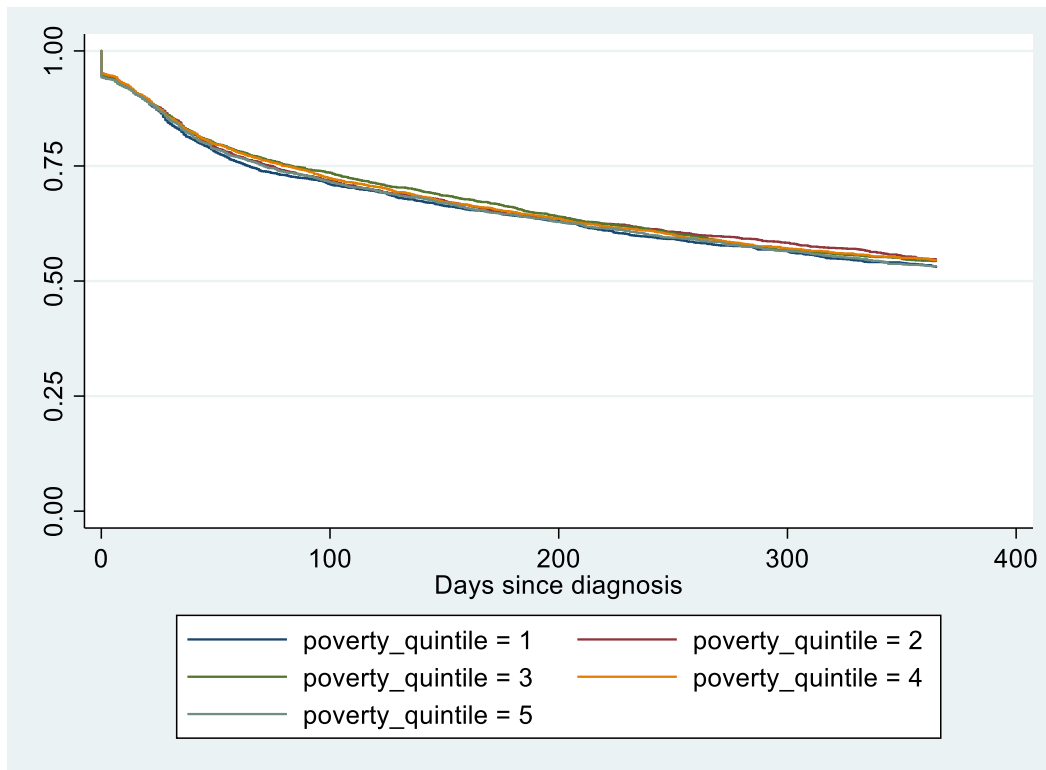

**Supplementary Figure 2.** Kaplan-Meier curves of checkpoint inhibitor initiation following metastatic lung cancer diagnosis by quintiles of poverty in a county (higher quintiles indicate greater percentage of population living below poverty line), with follow-up truncated at 1 year. P-value from log-rank test >0.05.

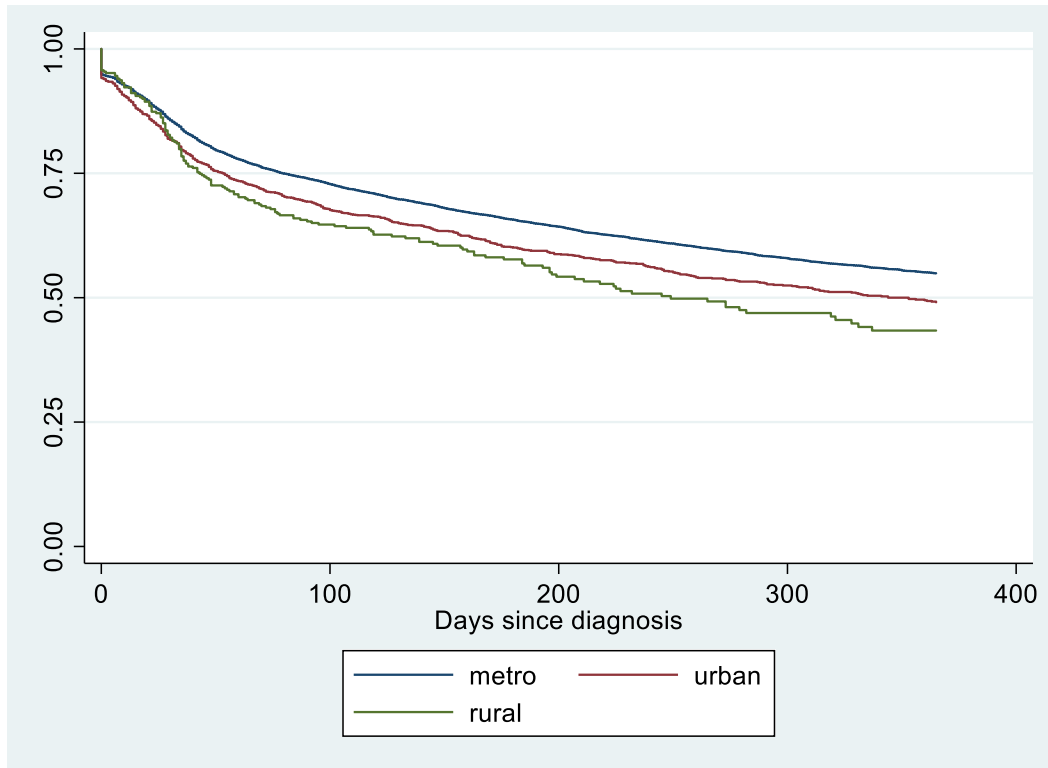

**Supplementary Figure 3.** Kaplan-Meier curves of checkpoint inhibitor initiation following metastatic lung cancer diagnosis by urbanity, with follow-up truncated at 1 year. P-value from log-rank test <0.05.

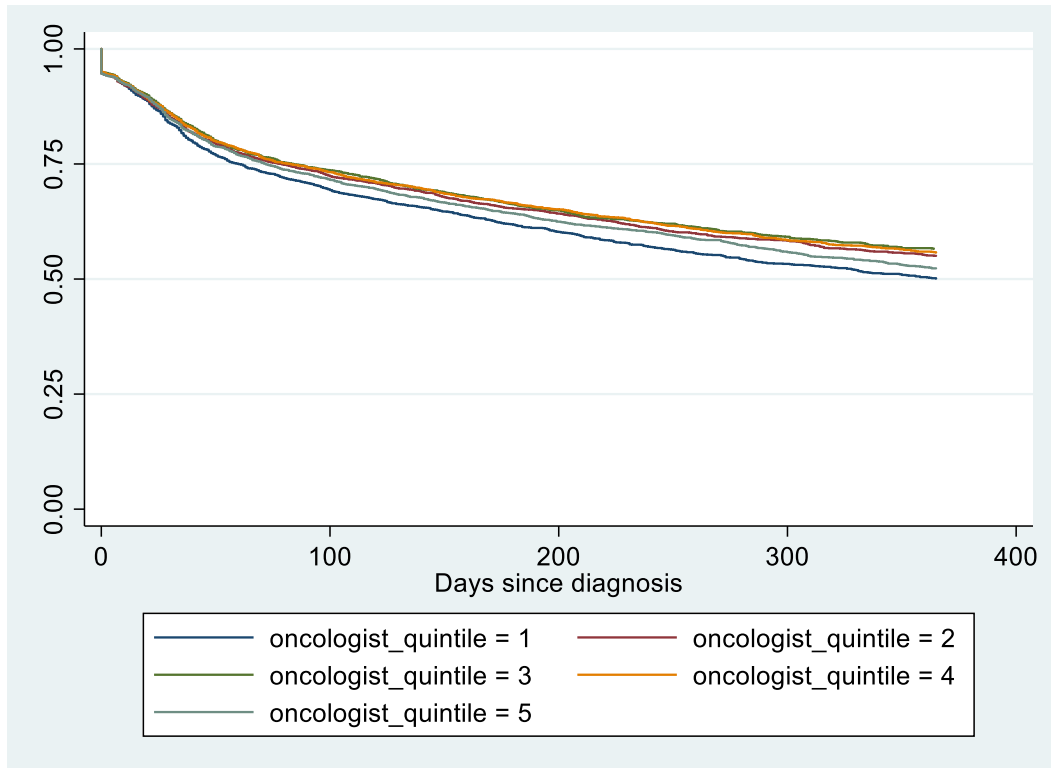

**Supplementary Figure 4.** Kaplan-Meier curves of checkpoint inhibitor initiation following metastatic lung cancer diagnosis by quintiles of density of oncologists in a county (higher quintiles indicate greater number of oncologists per population in a county), with follow-up truncated at 1 year. P-value from log-rank test <0.05.



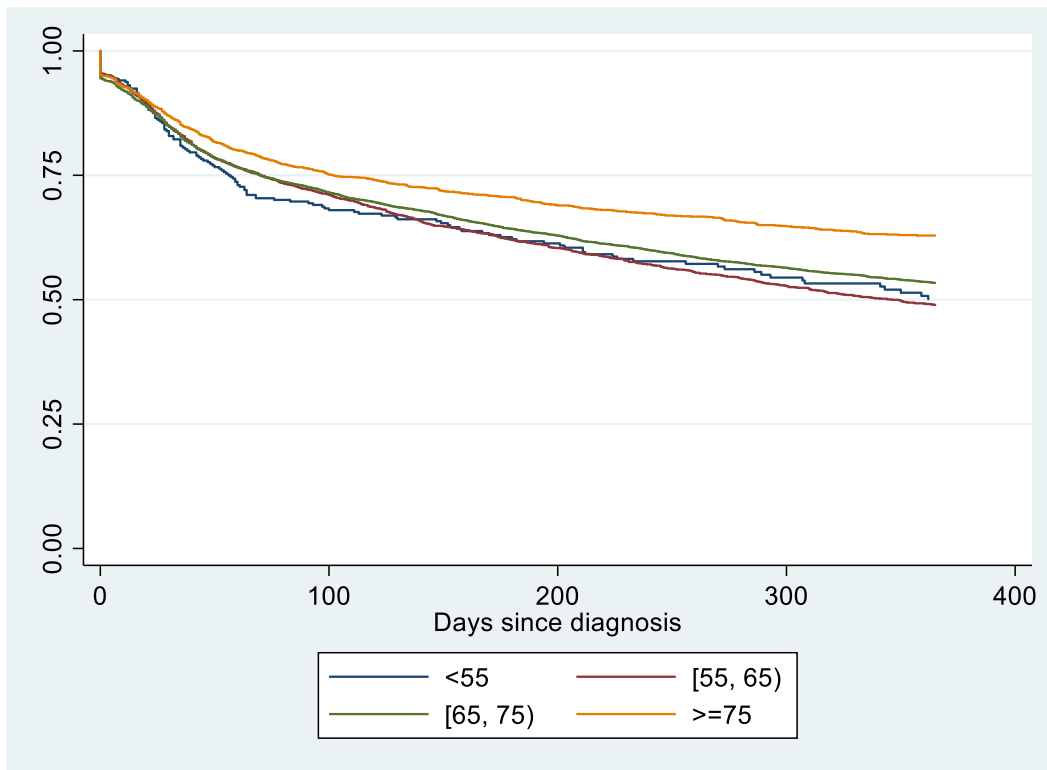

**Supplementary Figure 5.** Kaplan-Meier curves of checkpoint inhibitor initiation following metastatic lung cancer diagnosis by patient's age, with follow-up truncated at 1 year. P-value from log-rank test <0.05.

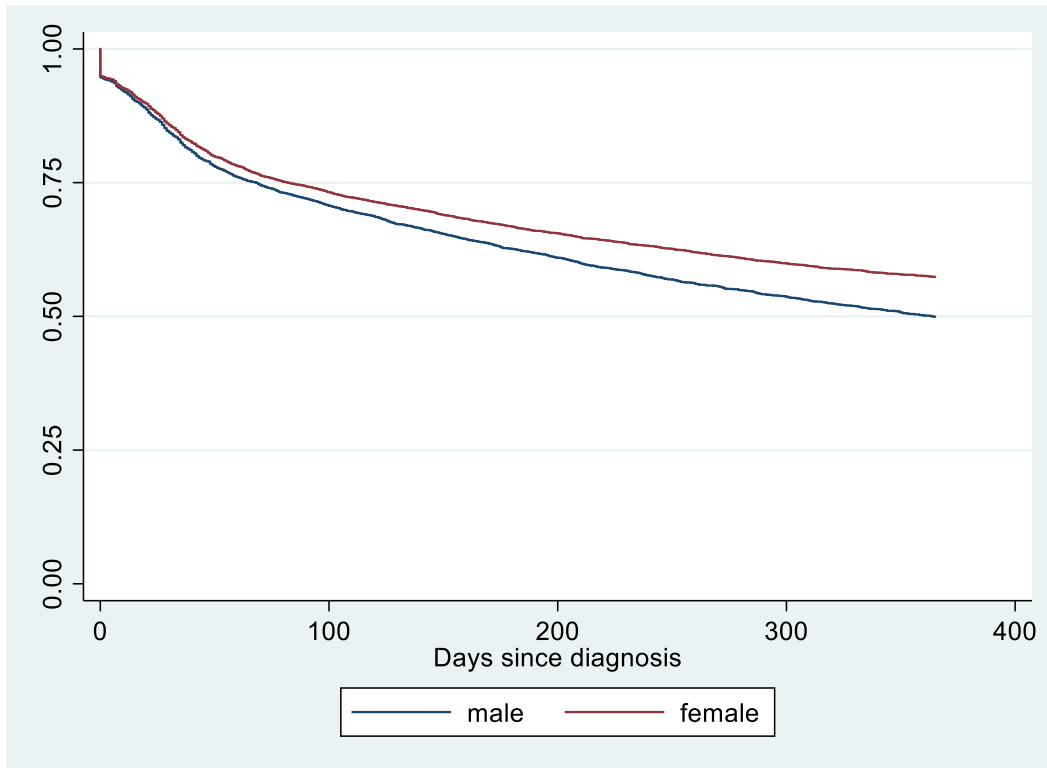

**Supplementary Figure 6.** Kaplan-Meier curves of checkpoint inhibitor initiation following metastatic lung cancer diagnosis by patient's sex, with follow-up truncated at 1 year. P-value from log-rank test <0.05.

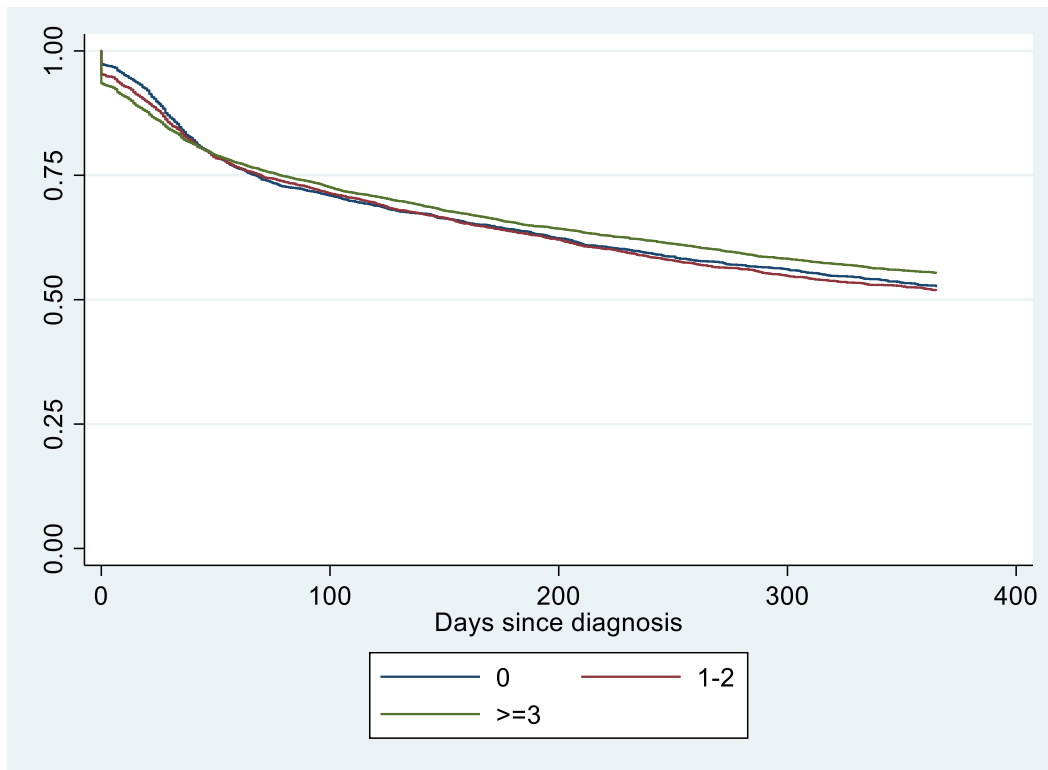

**Supplementary Figure 7.** Kaplan-Meier curves of checkpoint inhibitor initiation following metastatic lung cancer diagnosis by patient's Charlson comorbidity score, with follow-up truncated at 1 year. P-value from log-rank test  $<0.05$ .

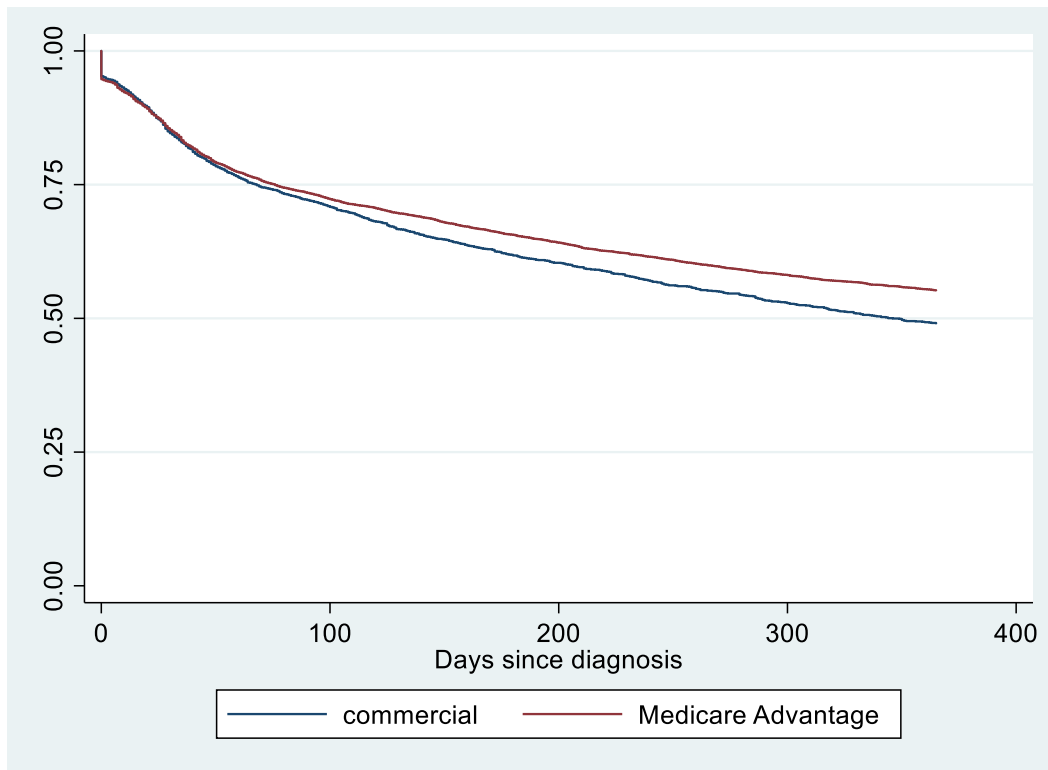

**Supplementary Figure 8.** Kaplan-Meier curves of checkpoint inhibitor initiation following metastatic lung cancer diagnosis by employer-sponsored commercial insurance vs. Medicare Advantage, with follow-up truncated at 1 year. P-value from log-rank test <0.05.

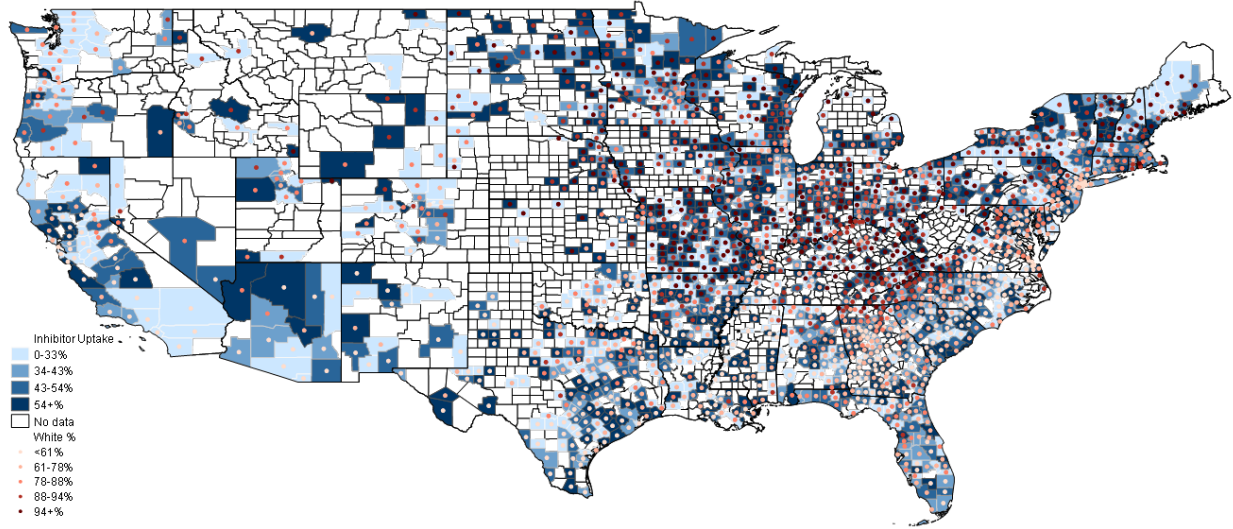

**Supplementary Figure 9.** Geographic variation in uptake of immune checkpoint inhibitors between 2015 and 2020 by metastatic lung cancer patients with employer-sponsored commercial insurance or Medicare Advantage, overlaid with percentage of white population in a county.

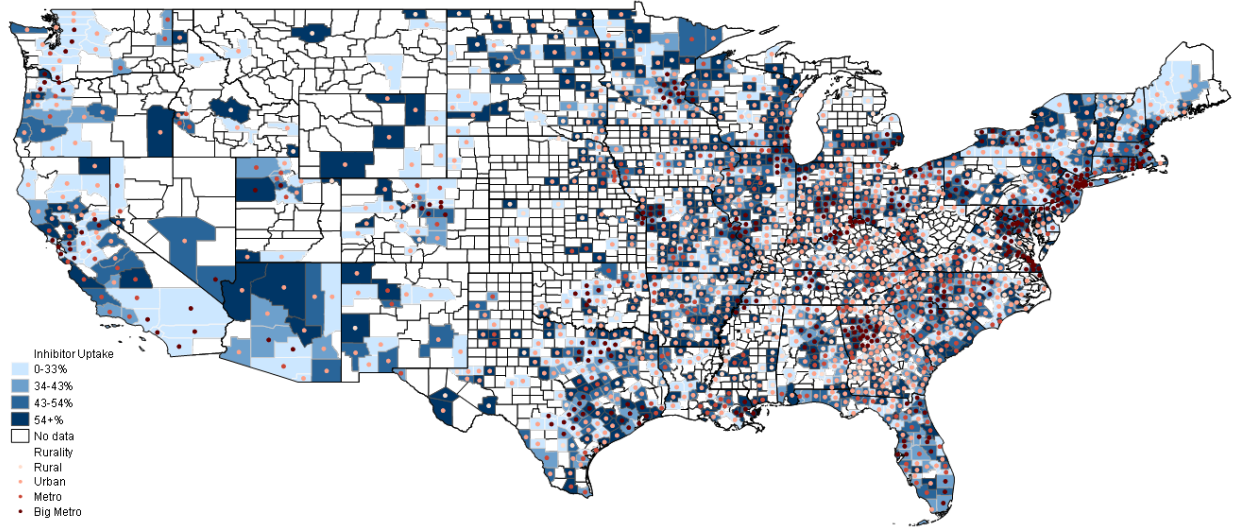

**Supplementary Figure 10.** Geographic variation in uptake of immune checkpoint inhibitors between 2015 and 2020 by metastatic lung cancer patients with employer-sponsored commercial insurance or Medicare Advantage, overlaid with rurality of a county.

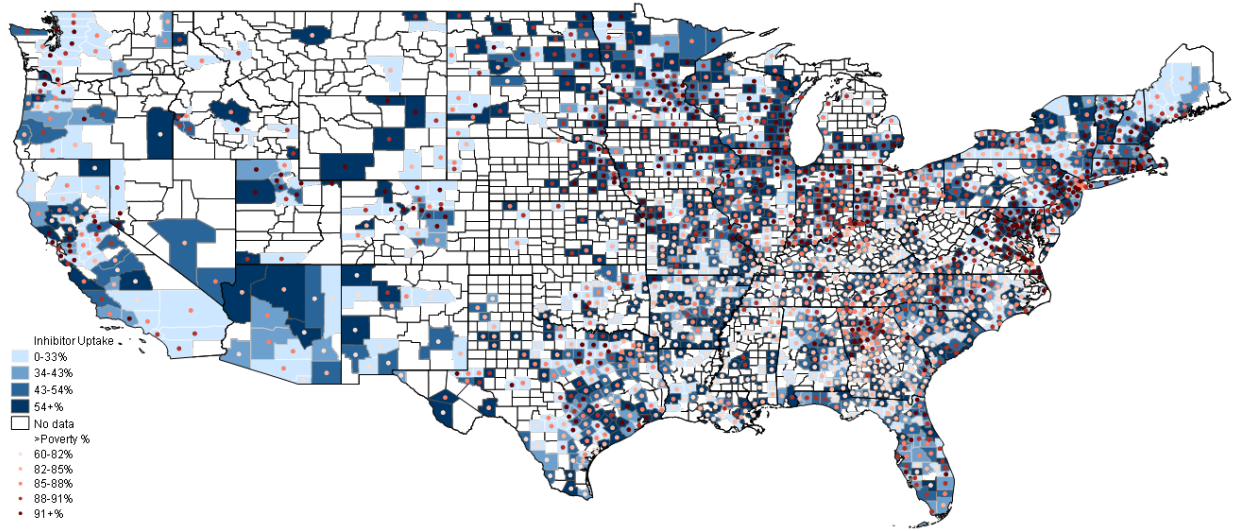

**Supplementary Figure 11.** Geographic variation in uptake of immune checkpoint inhibitors between 2015 and 2020 by metastatic lung cancer patients with employer-sponsored commercial insurance or Medicare Advantage, overlaid with percentage of population in poverty of a county.

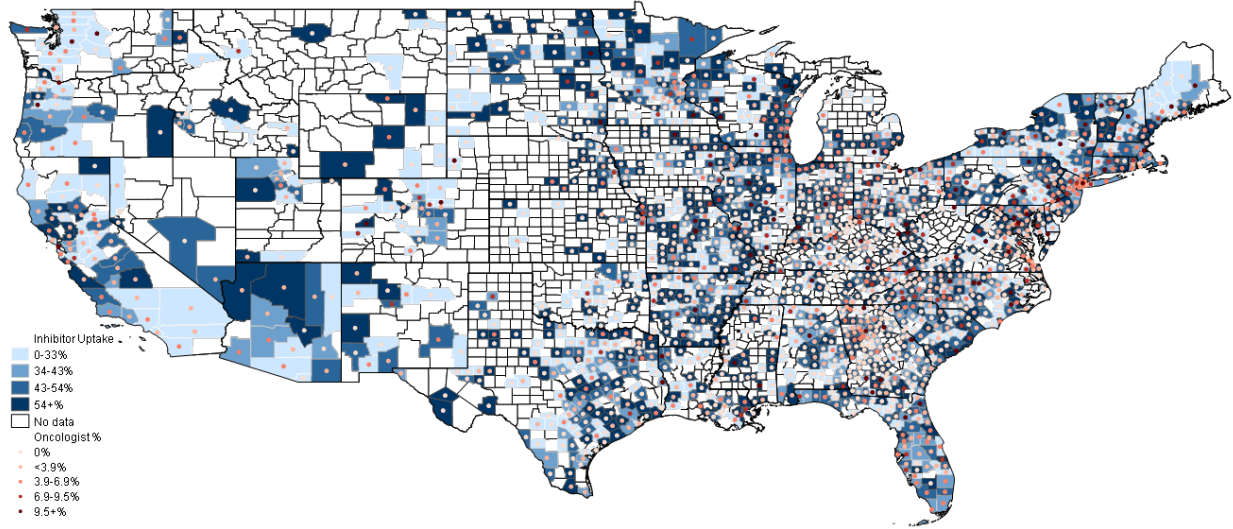

**Supplementary Figure 12.** Geographic variation in uptake of immune checkpoint inhibitors between 2015 and 2020 by metastatic lung cancer patients with employer-sponsored commercial insurance or Medicare Advantage, overlaid with number of oncologists per population of a county.
